# Supplementary material
Source: Springer Nature journal article supplement (https://www.springermedizin.de/resource/supplementary/12992_2013_204_MOESM1_ESM.pdf/9616688)
Supplement: MOESM1 [file 9616688]

Context:  
why?

Process:  
how?

Actors:  
who?

Content:  
what?

Impact:  
so what?
